# Supplementary material
Source: MDPI journal article supplement (https://www.mdpi.com/2076-3263/11/10/404)
Supplement: s1 [file s1 › geosciences-1374837-supplementary.pdf]

Article

# Reconstructing the Gorte and Spiaz de Navesele Landslides, NE of Lake Garda, Trentino Dolomites (Italy)

Giacomo Ruggia <sup>1</sup>, Susan Ivy-Ochs <sup>1,2</sup>, Jordan Aaron <sup>1</sup>, Olivia Steinemann <sup>2</sup>, Silvana Martin <sup>3</sup>, Manuel Rigo <sup>3</sup>, Sandro Rossato <sup>3,\*</sup>, Christof Vockenhuber <sup>2</sup>, Giovanni Monegato <sup>4</sup> and Alfio Viganò <sup>5</sup>

<sup>1</sup> Department of Earth Sciences, ETH Zürich, Sonneggstrasse 5, 8092 Zürich, Switzerland;

giacomo.ruggia@sunrise.ch (G.R.); ivy@phys.ethz.ch (S.I.-O.); jordan.aaron@erdw.ethz.ch (J.A.)

<sup>2</sup> Laboratory of Ion Beam Physics, ETH Hönggerberg, Otto-Stern-Weg 5, 8093 Zürich, Switzerland; okronig@phys.ethz.ch (O.S.); vockenhuber@phys.ethz.ch (C.V.)

<sup>3</sup> Department of Geosciences, University of Padova, Via Gradenigo 6, 35131 Padova, Italy; silvana.martin@unipd.it (S.M.); manuel.rigo@unipd.it (M.R.)

<sup>4</sup> Institute of Geosciences and Earth Resources, National Research Council of Italy, Via Gradenigo 6, 35131 Padova, Italy; giovanni.monegato@igg.cnr.it

<sup>5</sup> Servizio Geologico, Provincia Autonoma di Trento, Via Zambra 42, 38121 Trento, Italy; alfio.vigano@provincia.tn.it

\* Correspondence: sandro.rossato@unipd.it

**Supplementary Materials:** The descriptions of the thin sections obtained from sampled boulders are available online at [www.mdpi.com/article/10.3390/geosciences11100404/s1](http://www.mdpi.com/article/10.3390/geosciences11100404/s1), Figure S1: Thin sections from sampled boulders.

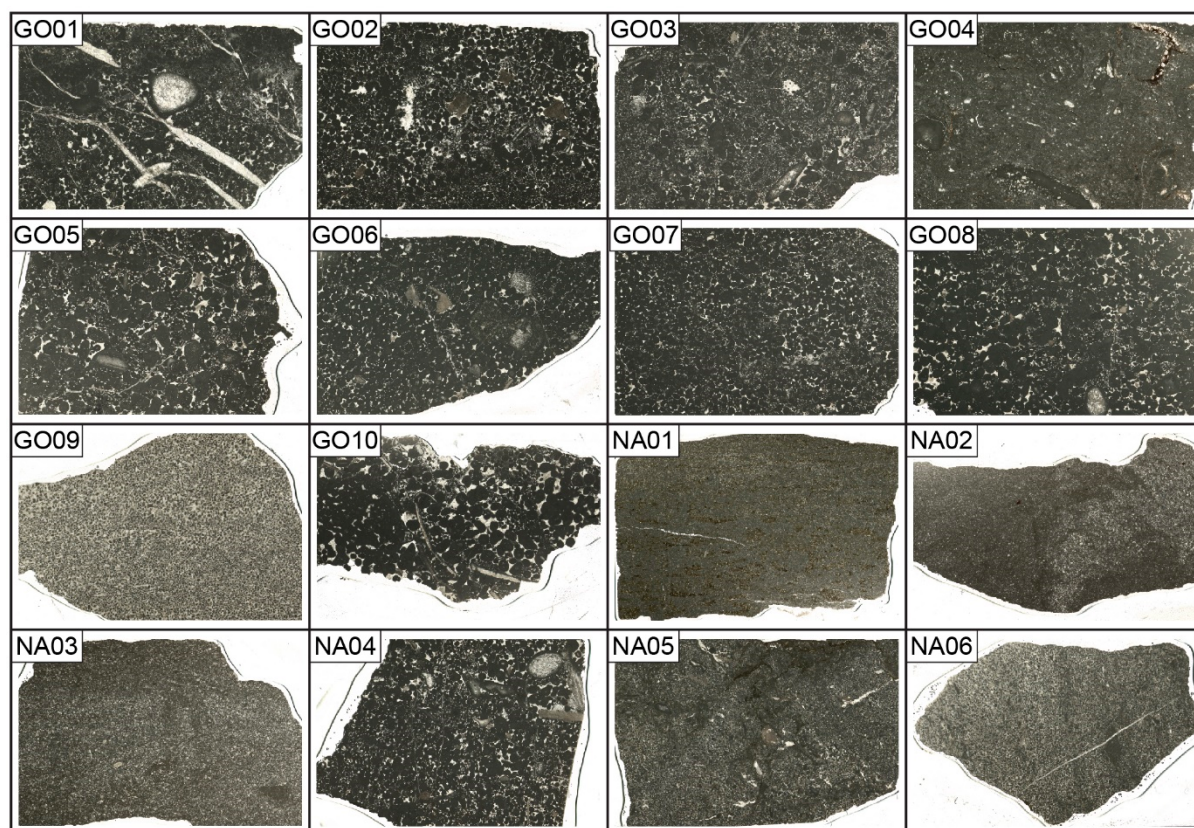

**Figure S1.** Thin sections from sampled boulders.

## Samples description

The main characteristics of the collected samples are here reported.

**GO01** Oolitic grainstone with bioclasts, such as calcisponge, bivalve and echinoderm fragments. Massone Oolite Formation (OOM).

**GO02** Oolitic grainstone with bioclasts, such as echinoderm, crinoid and bivalve fragments. Massone Oolite Formation (OOM).

**GO03** Oolitic grainstone with bioclasts, such as calcisponge, bivalve and echinoderm fragments. Massone Oolite Formation (OOM).

**GO04** Peloidal bioclastic packstone with bioclastic grains, like mollusks (bivalves, gastropods, foraminifera, calcareous algae. Formation of Rotzo (RTZ).

**GO05** Oolitic grainstone with bioclasts, such as echinoderms and bivalves. Massone Oolite Formation (OOM).

**GO06** Oolitic grainstone with bioclasts, such as echinoderms, brachiopods, and algae. Massone Oolite Formation (OOM).

**GO07** Oolitic grainstone with rare bioclasts. Massone Oolite Formation (OOM).

**GO08** Oolitic grainstone with bioclasts, such as calcisponges and echinoderms. Massone Oolite Formation (OOM).

**GO09** Bioclastic oolitic grainstone with skeletal grains, such as mollusks, foraminifera and ooids substituted by coarse microsparitic cement. Formation of Tofino (TOF).

**GO10** Oolitic grainstone with bivalve fragments. Massone Oolite Formation (OOM).

**NA01** Peloidal micritic packstone, partially dolomitized, with bioclasts. Formation of Tofino (TOF).

**NA02** Peloidal micritic packstone and grainstone with bioclasts. Formation of Tofino (TOF).

**NA03** Peloidal micritic grainstone and packstone, with bioclasts. Formation of Tofino (TOF).

**NA04** Grainstone with micro-oncoids and rare skeletal grains, like echinoderms, bivalves and calcisponges. Formation of Tofino (TOF).

**NA05** Oolitic grainstone (packstone subordinately) with foraminifera and echinoderm grains. Formation of Tofino (TOF).

**NA06** Oolitic -bioclastic grainstone with foraminifera, echinoderm and bivalve fragments. Formation of Tofino (TOF).
